# Supplementary material for: Li3V2(PO4)3 Cathode Material: Synthesis Method, High Lithium Diffusion Coefficient and Magnetic Inhomogeneity
Source: MDPI journal article supplement (doi:10.3390/ijms25052884), 2024-03-01
Supplement: s1 [file s1]

# **Li<sub>3</sub>V<sub>2</sub>(PO<sub>4</sub>)<sub>3</sub> Cathode Material: Synthesis Method, High Lithium Diffusion Coefficient and Magnetic Inhomogeneity**

**Tatiana Gavrilova <sup>1,\*</sup>, Yulia Deeva <sup>2</sup>, Anastasiya Uporova <sup>2</sup>, Tatiana Chupakhina <sup>2</sup>, Ivan Yatsyk <sup>1</sup>, Alexey Rogov <sup>1,3</sup>, Mikhail Cherosov <sup>3</sup>, Ruslan Batulin <sup>3</sup>, Mikhail Khrizanforov <sup>4,5</sup> and Sergey Khantimerov <sup>1</sup>**

<sup>1</sup> Kazan E. K. Zavoisky Physical-Technical Institute, FRC Kazan Scientific Center of RAS, Sibirsky Tract, 10/7, 420029 Kazan, Russia; i.yatzyk@gmail.com (I.Y.); alexeyrogov111@gmail.com (A.R.); khan-tim@mail.ru (S.K.)

<sup>2</sup> Institute of Solid State Chemistry of the Ural Branch of RAS, Pervomaiskaya Str., 91, 620990 Ekaterinburg, Russia; juliahik@mail.ru (Y.D.); nastyauporova99@gmail.com (A.U.); chupakhina@yandex.ru (T.C.)

<sup>3</sup> Institute of Physics, Kazan Federal University, Kremlyovskaya Str., 18, 420008 Kazan, Russia; mcherosov@gmail.com (M.C.); tokamak@yandex.ru (R.B.)

<sup>4</sup> Arbuzov Institute of Organic and Physical Chemistry, FRC Kazan Scientific Center of RAS, Arbuzov Str., 8, 420088 Kazan, Russia; khrizanforov@gmail.com

<sup>5</sup> Aleksander Butlerov Institute of Chemistry, Kazan Federal University, 1/29 Lobachevskogo Str., 420008 Kazan, Russia

\* Correspondence: t.gavrilova@knc.ru/tatyana.gavrilova@gmail.com

## **Supplementary Materials**

### **S1. Vanadyl Formate Synthesis**

The vanadyl formate synthesis was carried out according to the method described in [54] and showed in Figure S1:

✓ Vanadyl sulfate powder VO(SO<sub>4</sub>)<sub>2</sub>·3H<sub>2</sub>O in an amount of 5 g is dissolved in 100 mL of distilled water.

✓ 90 mL of 12% NH<sub>4</sub>OH solution is added to the resulting solution.

✓ The resulting brown oxide precipitate is filtered from the mother liquor using a filter paper with a pore size of 2–3 μm and clean with distilled water until there is no qualitative reaction to SO<sub>4</sub><sup>2-</sup> ions (on BaCl<sub>2</sub>).

✓ The precipitate is transferred to a heat-resistant glass with a volume of 600 ml, after that 100 ml of distilled water and 5 ml of 99.7% formic acid is added. In this case, the ratio of components is following vanadyl sulfate:ammonia (12–14%):formic acid (45–99.7%) = 1:2.0:1.5. After dissolving the brown precipitate, a blue solution is formed, which is evaporated at a temperature of 50°C for 90 minutes until vanadyl formate crystallizes.

✓ The X-ray phase analysis of the dried to constant weight blue crystals showed the resulting product is the single phase sample (Figure S2) with the chemical formula VO(HCOO)<sub>2</sub>·H<sub>2</sub>O).

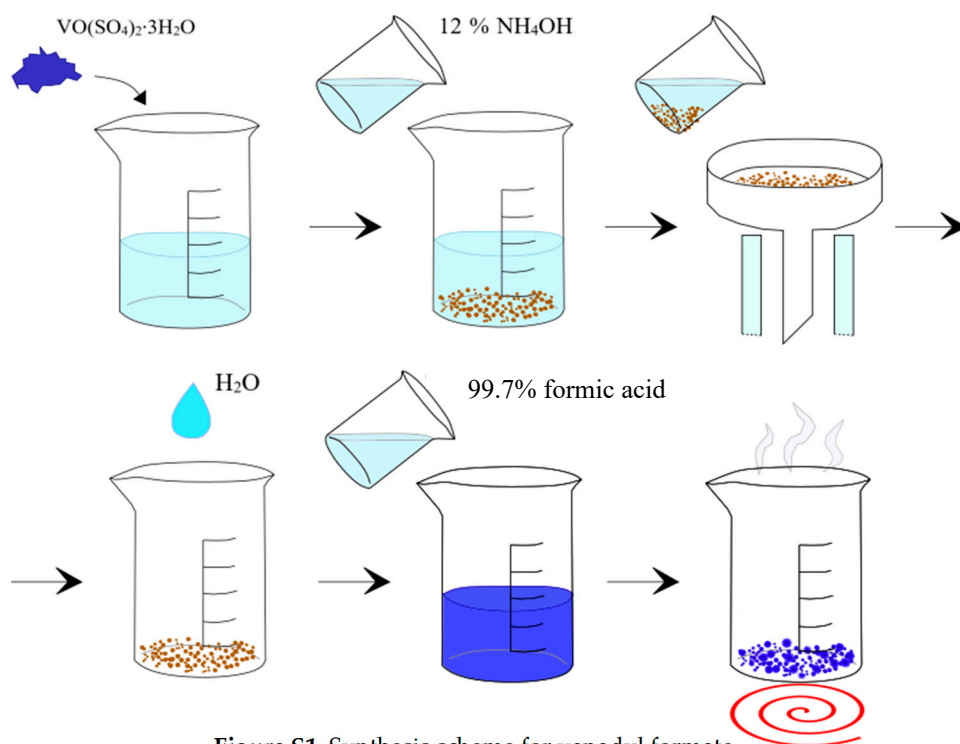

**Figure S1.** Synthesis scheme for vanadyl formate

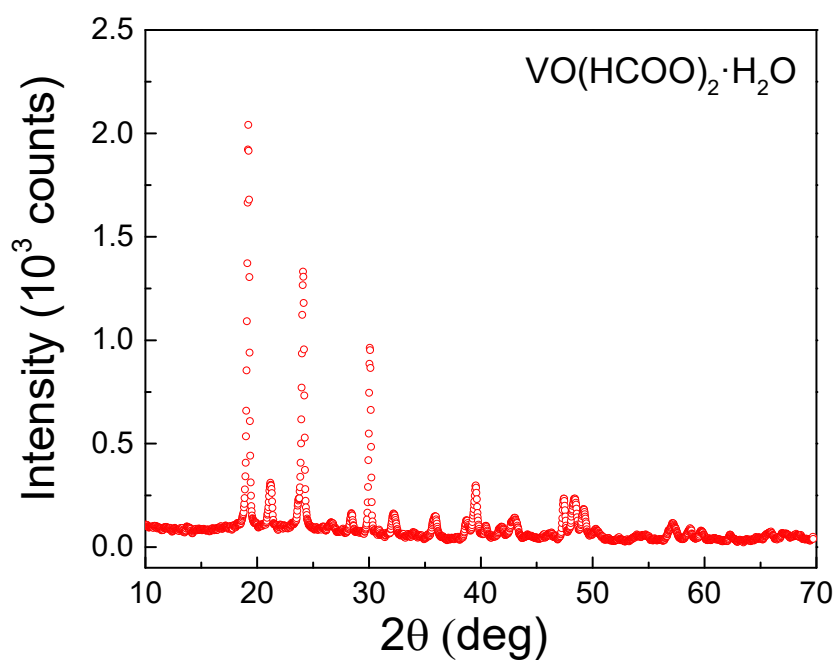

**Figure S2.** X-ray diffraction pattern of VO(HCOO)<sub>2</sub>·H<sub>2</sub>O

## S2. Phase formation of $\text{Li}_3\text{V}_2(\text{PO}_4)_3$ during the heat treatment

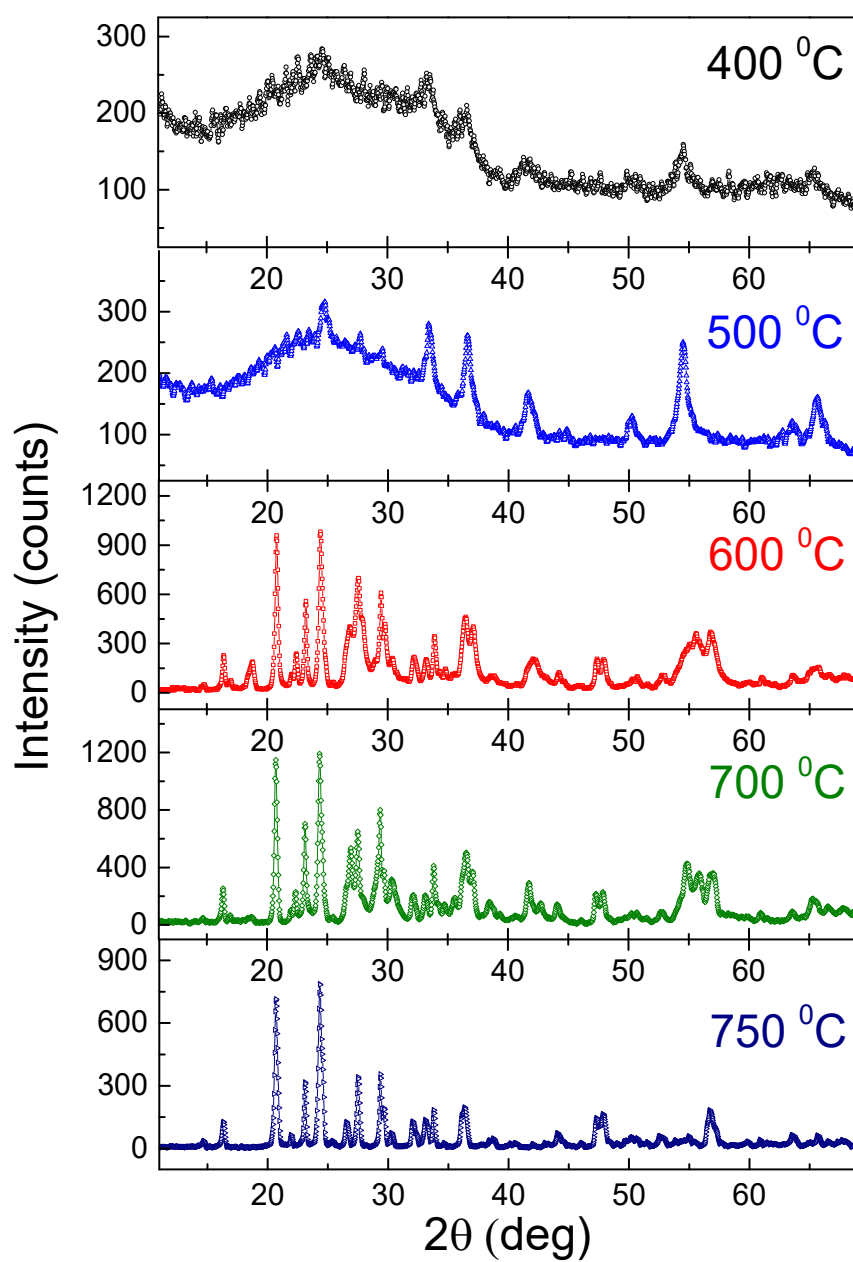

**Figure S3.** X-ray diffraction patterns of the precursor after thermal hydrolysis during the phase formation process of  $\text{Li}_3\text{V}_2(\text{PO}_4)_3$  during sequential heat treatment up to 750 °C

### S3. X-ray fluorescence analysis

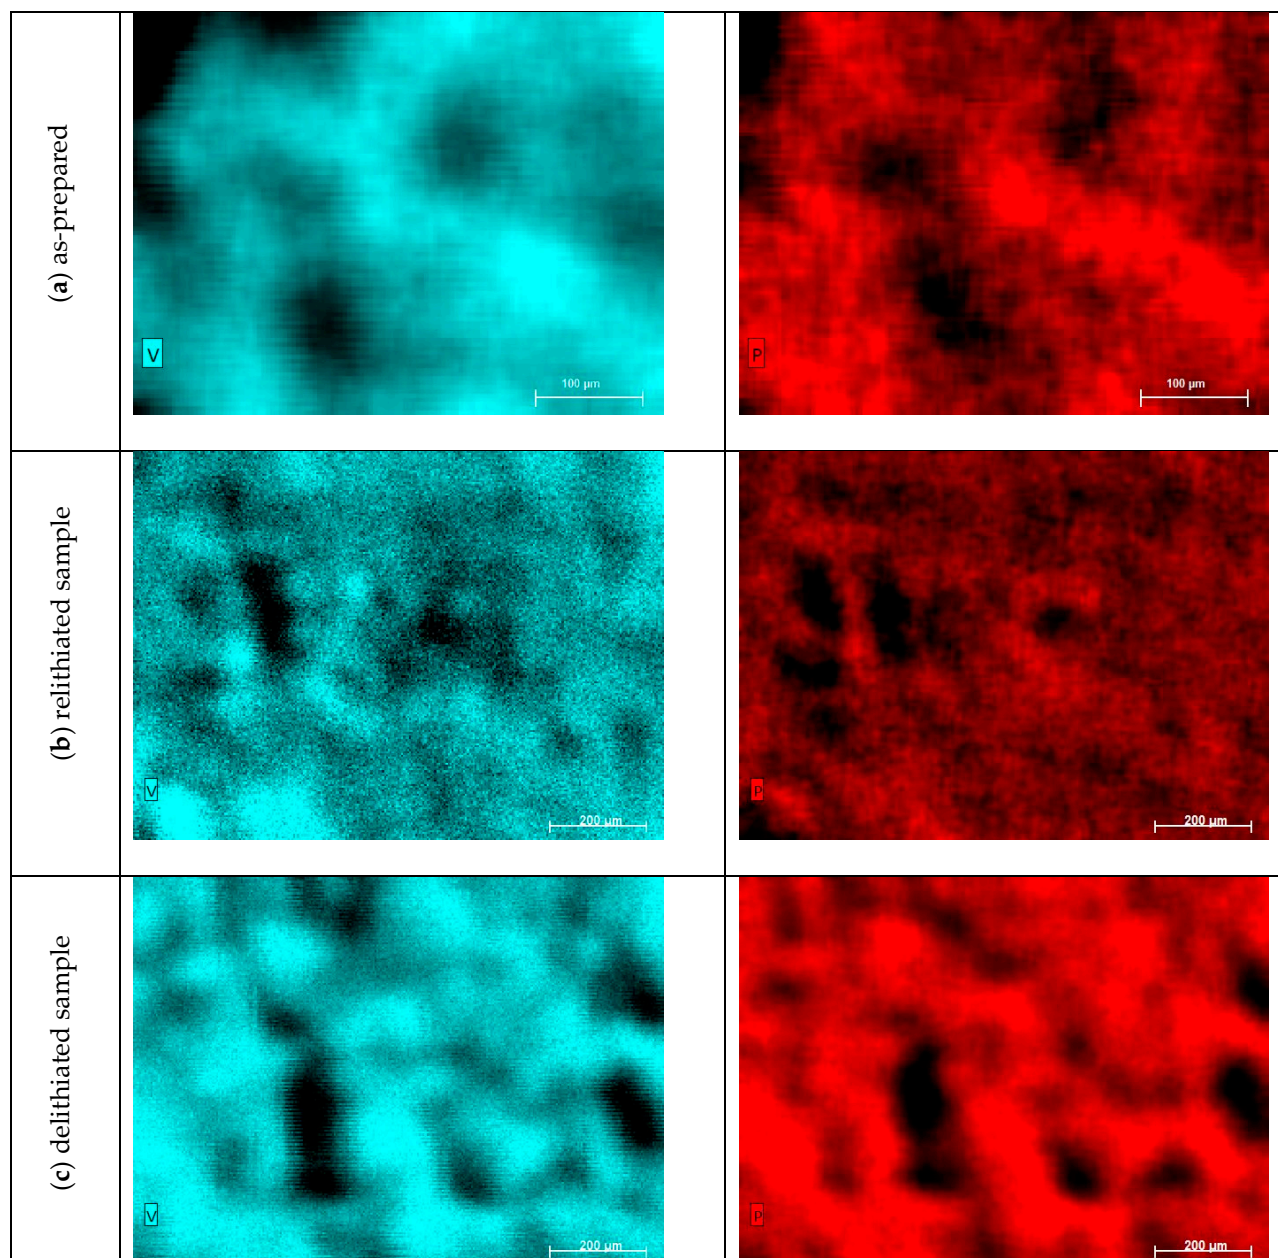

**Figure S4.** XFA images of LVPO (a) as-prepared sample, (b) relithiated sample and (c) delithiated sample. Dark areas correspond to the absence of a sample

#### S4. Magnetization measurements of $\text{Li}_3\text{V}_2(\text{PO}_4)_3$ -based composites

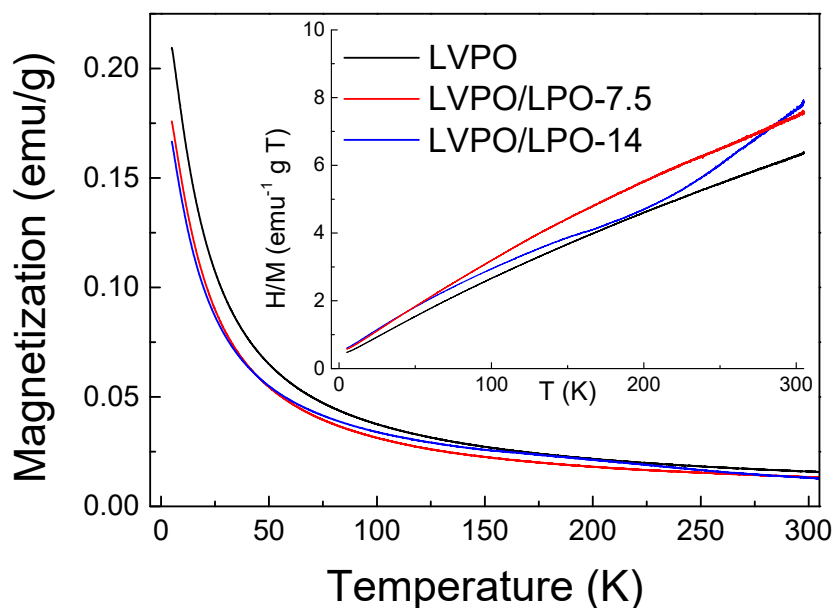

**Figure S5.** Magnetization  $M/H$  as a function of temperature for  $\text{Li}_3\text{V}_2(\text{PO}_4)_3$  sample and  $\text{Li}_3\text{V}_2(\text{PO}_4)_3$  (86 wt.%) /  $\text{Li}_3\text{PO}_4$  (14 wt.%) and  $\text{Li}_3\text{V}_2(\text{PO}_4)_3$  (92.5 wt.%) /  $\text{Li}_3\text{PO}_4$  (7.5 wt.%) composites measured in the FC regime in the external magnetic field  $H = 0.1$  T. The composites  $\text{Li}_3\text{V}_2(\text{PO}_4)_3$  (86 wt.%) /  $\text{Li}_3\text{PO}_4$  (14 wt.%) and  $\text{Li}_3\text{V}_2(\text{PO}_4)_3$  (92.5 wt.%) /  $\text{Li}_3\text{PO}_4$  (7.5 wt.%) are labeled as LVPO/LPO-14 and LVPO/LPO-7.5, respectively. Inset shows the inverse magnetic susceptibility  $H/M$  as a function of temperature.

#### S5. X-ray diffraction analysis

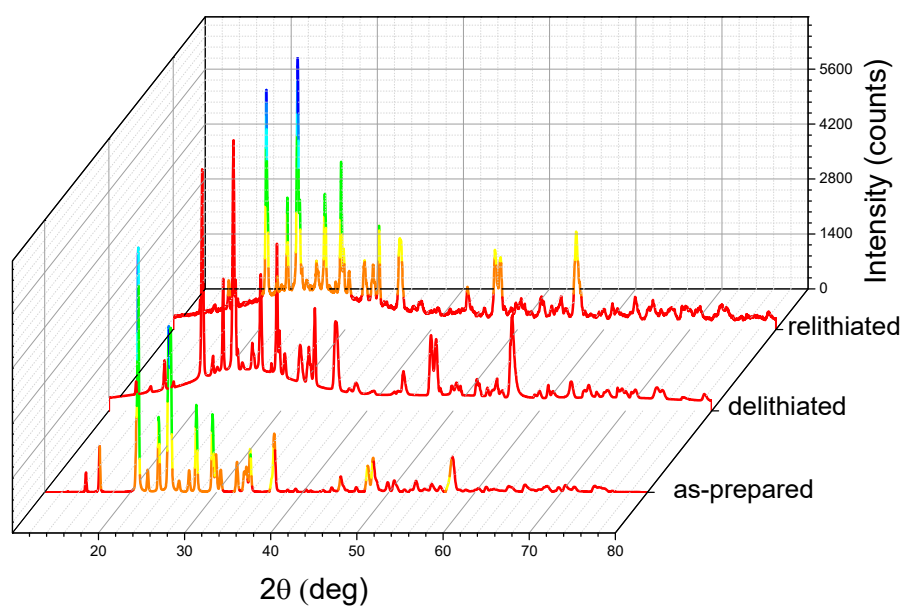

**Figure S6.** Experimental X-ray diffraction pattern of  $\text{Li}_3\text{V}_2(\text{PO}_4)_3$ : as-prepared, delithiated and relithiated samples.
